# Supplementary material for: Thermodynamic Signatures of Structural Transitions and Dissociation of Charged Colloidal Clusters: A Parallel Tempering Monte Carlo Study
Source: MDPI journal article supplement (doi:10.3390/molecules27082581), 2022-04-16
Supplement: s1 [file s1]

# **Thermodynamics signature of structural transitions and dissociation of charged colloidal clusters: a parallel tempering Monte Carlo study**

Frederico V. Prudente<sup>1</sup> and Jorge M. C. Marques<sup>2</sup>

<sup>1</sup> *Instituto de Física, Universidade Federal da Bahia, 40170-115 Salvador, BA, Brazil; prudente@ufba.br*

<sup>2</sup> *CQC, Department of Chemistry, University of Coimbra, 3004-535 Coimbra, Portugal; qtmarque@ci.uc.pt*

**Table S1.** Energy range of the structures from Set I, Set II, and Set III for each cluster size. For the Set I of  $N=17$  and  $N=18$ , there is only one structure whose energy is indicated.

| $N$ | Set I             | Set II               | Set III          |
|-----|-------------------|----------------------|------------------|
| 9   | (-15.562,-15.290) | (-10.790,-9.372)     | (-7.558,-4.702)  |
| 10  | (-17.211,-16.581) | (-13.885,-9.810)     | (-8.922,-5.168)  |
| 11  | (-18.091,-17.748) | (-15.516,-10.261)    | (-8.472,-5.632)  |
| 12  | (-19.338,-18.580) | (-16.356,-10.717)    | (-8.933,-6.096)  |
| 17  | -24.198           | (-23.181,-17.634)    | (-10.183,-8.414) |
| 18  | -25.108           | a: (-24.538,-22.779) | (-10.646,-8.877) |
|     |                   | b: (-21.826,-18.099) |                  |
| 19  | (-26.154,-24.902) | a: (-24.332,-22.304) | (-11.109,-9.304) |
|     |                   | b: (-21.208,-16.785) |                  |
| 20  | (-27.291,-26.296) | a: (-25.773,-22.774) | (-11.572,-9.804) |
|     |                   | b: (-21.657,-19.027) |                  |

## Small clusters data

$N=9$

SET I:

|                                                                                                                  |                                                                                                                  |                                                                                                                    |
|------------------------------------------------------------------------------------------------------------------|------------------------------------------------------------------------------------------------------------------|--------------------------------------------------------------------------------------------------------------------|
| 9A<br>Energy: -15.56156020<br>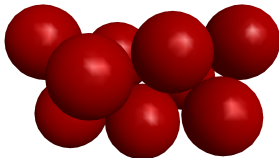  | 9B<br>Energy: -15.55806630<br>  | 9C<br>Energy: -15.46152621<br>  |
| 9D<br>Energy: -15.37419913<br> | 9E<br>Energy: -15.35417435<br> | 9F<br>Energy: -15.28992983<br> |

SET II

|                                                                                                                   |                                                                                                                   |                                                                                                                    |
|-------------------------------------------------------------------------------------------------------------------|-------------------------------------------------------------------------------------------------------------------|--------------------------------------------------------------------------------------------------------------------|
| 9G<br>Energy: -10.78993014<br>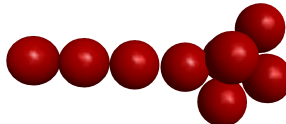 | 9H<br>Energy: -10.21788243<br> | 9I<br>Energy: -9.37254143<br> |
|-------------------------------------------------------------------------------------------------------------------|-------------------------------------------------------------------------------------------------------------------|--------------------------------------------------------------------------------------------------------------------|

SET III

|                                                                                                                  |                                                                                                                  |                                                                                                                    |
|------------------------------------------------------------------------------------------------------------------|------------------------------------------------------------------------------------------------------------------|--------------------------------------------------------------------------------------------------------------------|
| 9J<br>Energy: -7.55783121<br>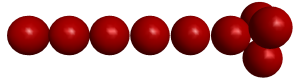 | 9K<br>Energy: -7.39310189<br> | 9L<br>Energy: -6.54710392<br> |
|------------------------------------------------------------------------------------------------------------------|------------------------------------------------------------------------------------------------------------------|--------------------------------------------------------------------------------------------------------------------|

|                                                                                                                |                                                                                                                |                                                                                                                  |
|----------------------------------------------------------------------------------------------------------------|----------------------------------------------------------------------------------------------------------------|------------------------------------------------------------------------------------------------------------------|
| 9M<br>Energy: -6.48545675<br>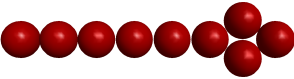 | 9N<br>Energy: -5.62736246<br> | 9O<br>Energy: -5.24671446<br> |
| 9P<br>Energy: -5.10267896<br> | 9Q<br>Energy: -4.70201501<br> |                                                                                                                  |

$N=10$

SET I

|                                                                                                                    |                                                                                                                    |                                                                                                                      |
|--------------------------------------------------------------------------------------------------------------------|--------------------------------------------------------------------------------------------------------------------|----------------------------------------------------------------------------------------------------------------------|
| 10A<br>Energy: -17.21101095<br>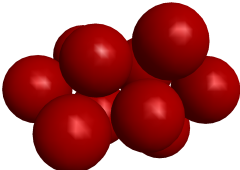 | 10B<br>Energy: -16.87425093<br> | 10C<br>Energy: -16.68045730<br> |
| 10D<br>Energy: -16.64222794<br> | 10E<br>Energy: -16.62190950<br> | 10F<br>Energy: -16.58118497<br> |



## SET II

|                                                                                                                   |                                                                                                                  |                                                                                                                    |
|-------------------------------------------------------------------------------------------------------------------|------------------------------------------------------------------------------------------------------------------|--------------------------------------------------------------------------------------------------------------------|
| 10G<br>Energy: -13.88520948<br>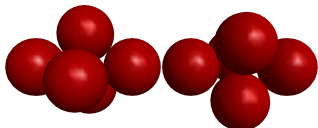  | 10H<br>Energy: -12.46579791<br> | 10I<br>Energy: -12.00287046<br> |
| 10J<br>Energy: -11.46719574<br>  | 10K<br>Energy: -11.18262418<br> | 10L<br>Energy: -10.69663547<br> |
| 10M<br>Energy: -9.81047846<br> |                                                                                                                  |                                                                                                                    |

## SET III

|                                                                                                                   |                                                                                                                   |                                                                                                                     |
|-------------------------------------------------------------------------------------------------------------------|-------------------------------------------------------------------------------------------------------------------|---------------------------------------------------------------------------------------------------------------------|
| 10N<br>Energy: -8.92247264<br>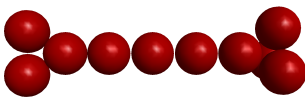 | 10O<br>Energy: -8.01291959<br> | 10P<br>Energy: -7.85884213<br> |
| 10Q<br>Energy: -7.01105861<br> | 10R<br>Energy: -6.94437832<br> | 10S<br>Energy: -6.09081450<br> |

|                                                                                                                 |                                                                                                                 |  |
|-----------------------------------------------------------------------------------------------------------------|-----------------------------------------------------------------------------------------------------------------|--|
| 10T<br>Energy: -5.70562160<br>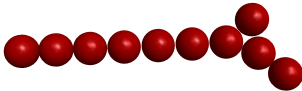 | 10U<br>Energy: -5.16777479<br> |  |
|-----------------------------------------------------------------------------------------------------------------|-----------------------------------------------------------------------------------------------------------------|--|

$N=11$

SET I

|                                                                                                                    |                                                                                                                   |                                                                                                                     |
|--------------------------------------------------------------------------------------------------------------------|-------------------------------------------------------------------------------------------------------------------|---------------------------------------------------------------------------------------------------------------------|
| 11A<br>Energy: -18.09068047<br>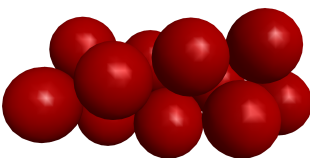  | 11B<br>Energy: -17.85065043<br> | 11C<br>Energy: -17.80311256<br> |
| 11D<br>Energy: -17.74788989<br> |                                                                                                                   |                                                                                                                     |

SET II

|                                                                                                                    |                                                                                                                    |                                                                                                                      |
|--------------------------------------------------------------------------------------------------------------------|--------------------------------------------------------------------------------------------------------------------|----------------------------------------------------------------------------------------------------------------------|
| 11E<br>Energy: -15.51605893<br>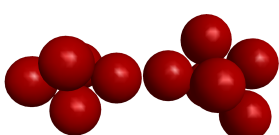 | 11F<br>Energy: -14.78362454<br> | 11G<br>Energy: -14.64097653<br> |
|--------------------------------------------------------------------------------------------------------------------|--------------------------------------------------------------------------------------------------------------------|----------------------------------------------------------------------------------------------------------------------|

|                                                                                                                  |                                                                                                                  |                                                                                                                    |
|------------------------------------------------------------------------------------------------------------------|------------------------------------------------------------------------------------------------------------------|--------------------------------------------------------------------------------------------------------------------|
| 11H<br>Energy: -14.20555101<br>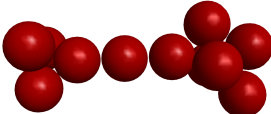 | 11I<br>Energy: -13.57236423<br> | 11J<br>Energy: -13.01227628<br> |
| 11K<br>Energy: -12.48451081<br> | 11L<br>Energy: -11.97787636<br> | 11M<br>Energy: -11.16475660<br> |
| 11N<br>Energy: -10.26084011<br> |                                                                                                                  |                                                                                                                    |

### SET III

|                                                                                                                   |                                                                                                                   |                                                                                                                     |
|-------------------------------------------------------------------------------------------------------------------|-------------------------------------------------------------------------------------------------------------------|---------------------------------------------------------------------------------------------------------------------|
| 11O<br>Energy: -8.47198864<br>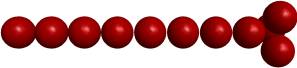 | 11P<br>Energy: -7.40544575<br> | 11Q<br>Energy: -6.55424225<br> |
| 11R<br>Energy: -6.16667287<br> | 11S<br>Energy: -5.63242993<br> |                                                                                                                     |

$N=12$

SET I

|                                                                                                                  |                                                                                                                  |  |
|------------------------------------------------------------------------------------------------------------------|------------------------------------------------------------------------------------------------------------------|--|
| 12A<br>Energy: -19.33769398<br>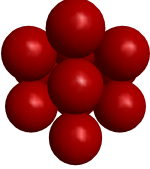 | 12B<br>Energy: -18.58018841<br> |  |
|------------------------------------------------------------------------------------------------------------------|------------------------------------------------------------------------------------------------------------------|--|

SET II

|                                                                                                                    |                                                                                                                    |                                                                                                                      |
|--------------------------------------------------------------------------------------------------------------------|--------------------------------------------------------------------------------------------------------------------|----------------------------------------------------------------------------------------------------------------------|
| 12C<br>Energy: -16.35607159<br>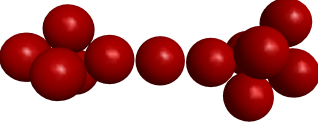  | 12D<br>Energy: -15.51831926<br> | 12E<br>Energy: -15.22193037<br> |
| 12F<br>Energy: -14.77758078<br> | 12G<br>Energy: -14.12146597<br> | 12H<br>Energy: -13.51098250<br> |
| 12I<br>Energy: -12.46106057<br> | 12J<br>Energy: -11.62952326<br> | 12K<br>Energy: -10.71737568<br> |

SET III

|                                                                                                                      |                                                                                                                      |                                                                                                                        |
|----------------------------------------------------------------------------------------------------------------------|----------------------------------------------------------------------------------------------------------------------|------------------------------------------------------------------------------------------------------------------------|
| <p>12L<br/>Energy: -8.93305764</p> 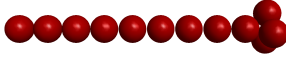 | <p>12M<br/>Energy: -7.86757644</p>  | <p>12N<br/>Energy: -7.01762623</p>  |
| <p>12O<br/>Energy: -6.62879110</p>  | <p>12P<br/>Energy: -6.09647630</p>  |                                                                                                                        |

## Larger clusters data

$N=17$

SET I

|                                                                                                                  |  |  |
|------------------------------------------------------------------------------------------------------------------|--|--|
| 17A<br>Energy: -24.19775922<br> |  |  |
|------------------------------------------------------------------------------------------------------------------|--|--|

SET II

|                                                                                                                    |                                                                                                                    |                                                                                                                      |
|--------------------------------------------------------------------------------------------------------------------|--------------------------------------------------------------------------------------------------------------------|----------------------------------------------------------------------------------------------------------------------|
| 17B<br>Energy: -23.18147845<br>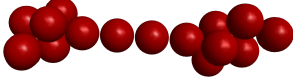 | 17C<br>Energy: -22.36142585<br> | 17D<br>Energy: -22.36142245<br> |
| 17E<br>Energy: -22.25523432<br> | 17F<br>Energy: -21.33582304<br> | 17G<br>Energy: -20.26432848<br> |
| 17H<br>Energy: -20.04639508<br> | 17I<br>Energy: -18.95418110<br> | 17J<br>Energy: -17.63445734<br> |

SET III

|                                                                                                                       |                                                                                                                      |                                                                                                                        |
|-----------------------------------------------------------------------------------------------------------------------|----------------------------------------------------------------------------------------------------------------------|------------------------------------------------------------------------------------------------------------------------|
| <p>17K<br/>Energy: -10.18269373</p> 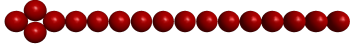 | <p>17L<br/>Energy: -9.33416592</p>  | <p>17M<br/>Energy: -8.94388763</p>  |
| <p>17N<br/>Energy: -8.41378484</p>   |                                                                                                                      |                                                                                                                        |

$N=18$

SET I

|                                                                                                                         |  |  |
|-------------------------------------------------------------------------------------------------------------------------|--|--|
| <p>18A<br/>Energy: -25.10845390</p>  |  |  |
|-------------------------------------------------------------------------------------------------------------------------|--|--|

## SET IIa

|                                                                                                                    |                                                                                                                  |                                                                                                                    |
|--------------------------------------------------------------------------------------------------------------------|------------------------------------------------------------------------------------------------------------------|--------------------------------------------------------------------------------------------------------------------|
| 18B<br>Energy: -24.53813820<br>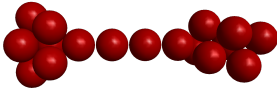   | 18C<br>Energy: -23.79528244<br> | 18D<br>Energy: -23.79528024<br> |
| 18E<br>Energy: -23.75460477<br>   | 18F<br>Energy: -22.89050733<br> | 18G<br>Energy: -22.89050611<br> |
| 18H<br>Energy: -22.77932744<br> |                                                                                                                  |                                                                                                                    |

## SET IIb

|                                                                                                                    |                                                                                                                    |                                                                                                                      |
|--------------------------------------------------------------------------------------------------------------------|--------------------------------------------------------------------------------------------------------------------|----------------------------------------------------------------------------------------------------------------------|
| 18I<br>Energy: -21.82630174<br>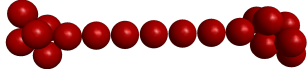 | 18J<br>Energy: -20.73902524<br> | 18K<br>Energy: -20.51963552<br> |
| 18L<br>Energy: -19.42168115<br> | 18M<br>Energy: -18.09930357<br> |                                                                                                                      |



## SET III

|                                                                                                                  |                                                                                                                 |                                                                                                                   |
|------------------------------------------------------------------------------------------------------------------|-----------------------------------------------------------------------------------------------------------------|-------------------------------------------------------------------------------------------------------------------|
| 18N<br>Energy: -10.64593661<br> | 18O<br>Energy: -9.79744424<br> | 18P<br>Energy: -9.40712976<br> |
| 18Q<br>Energy: -8.87708291<br>  |                                                                                                                 |                                                                                                                   |

 $N=19$ 

## SET I

|                                                                                                                    |                                                                                                                    |                                                                                                                      |
|--------------------------------------------------------------------------------------------------------------------|--------------------------------------------------------------------------------------------------------------------|----------------------------------------------------------------------------------------------------------------------|
| 19A<br>Energy: -26.15384179<br>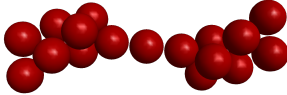 | 19B<br>Energy: -26.15380677<br> | 19C<br>Energy: -25.82448915<br> |
| 19D<br>Energy: -25.82448293<br> | 19E<br>Energy: -25.77530111<br> | 19F<br>Energy: -25.77528932<br> |
| 19G<br>Energy: -25.64763543<br> | 19H<br>Energy: -25.32602688<br> | 19I<br>Energy: -25.22691019<br> |

|                                                                                                                  |                                                                                                                  |                                                                                                                    |
|------------------------------------------------------------------------------------------------------------------|------------------------------------------------------------------------------------------------------------------|--------------------------------------------------------------------------------------------------------------------|
| 19J<br>Energy: -25.22690894<br>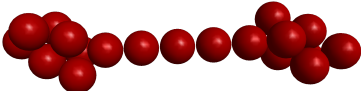 | 19K<br>Energy: -25.04443432<br> | 19L<br>Energy: -24.90223850<br> |
|------------------------------------------------------------------------------------------------------------------|------------------------------------------------------------------------------------------------------------------|--------------------------------------------------------------------------------------------------------------------|

# SET IIa

|                                                                                                                    |                                                                                                                  |                                                                                                                    |
|--------------------------------------------------------------------------------------------------------------------|------------------------------------------------------------------------------------------------------------------|--------------------------------------------------------------------------------------------------------------------|
| 19M<br>Energy: -24.33229396<br>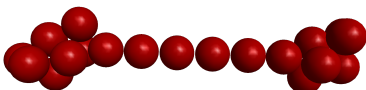   | 19N<br>Energy: -23.38694748<br> | 19O<br>Energy: -23.27318493<br> |
| 19P<br>Energy: -22.30356055<br> |                                                                                                                  |                                                                                                                    |

# SET IIb'

|                                                                                                                    |                                                                                                                    |                                                                                                                      |
|--------------------------------------------------------------------------------------------------------------------|--------------------------------------------------------------------------------------------------------------------|----------------------------------------------------------------------------------------------------------------------|
| 19Q<br>Energy: -21.20826570<br>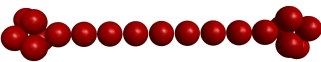 | 19R<br>Energy: -20.98809723<br> | 19S<br>Energy: -20.29574940<br> |
| 19T<br>Energy: -19.88718357<br> | 19U<br>Energy: -18.97362153<br> | 19V -18.56341295<br>            |

|                                                                                                                  |  |  |
|------------------------------------------------------------------------------------------------------------------|--|--|
| 19W<br>Energy: -16.78505999<br> |  |  |
|------------------------------------------------------------------------------------------------------------------|--|--|

### SET III

|                                                                                                                    |                                                                                                                  |                                                                                                                   |
|--------------------------------------------------------------------------------------------------------------------|------------------------------------------------------------------------------------------------------------------|-------------------------------------------------------------------------------------------------------------------|
| 19X<br>Energy: -11.10919223<br>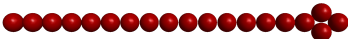   | 19Y<br>Energy: -10.26071989<br> | 19Z<br>Energy: -9.87038493<br> |
| 19ZA<br>Energy: -9.34036978<br> |                                                                                                                  |                                                                                                                   |

$N=20$

### SET I

|                                                                                                                    |                                                                                                                    |                                                                                                                      |
|--------------------------------------------------------------------------------------------------------------------|--------------------------------------------------------------------------------------------------------------------|----------------------------------------------------------------------------------------------------------------------|
| 20A<br>Energy: -27.29071051<br>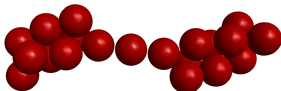 | 20B<br>Energy: -27.29066707<br> | 20C<br>Energy: -27.11649813<br> |
| 20D<br>Energy: -27.10925345<br> | 20E<br>Energy: -27.04871448<br> | 20F<br>Energy: -27.04870115<br> |

|                                                                                                                  |                                                                                                                  |                                                                                                                    |
|------------------------------------------------------------------------------------------------------------------|------------------------------------------------------------------------------------------------------------------|--------------------------------------------------------------------------------------------------------------------|
| 20G<br>Energy: -26.99198881<br>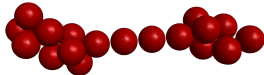 | 20H<br>Energy: -26.98188154<br> | 20I<br>Energy: -26.98177700<br> |
| 20J<br>Energy: -26.47371152<br> | 20K<br>Energy: -26.29580256<br> |                                                                                                                    |

### SET IIa

|                                                                                                                    |                                                                                                                    |                                                                                                                      |
|--------------------------------------------------------------------------------------------------------------------|--------------------------------------------------------------------------------------------------------------------|----------------------------------------------------------------------------------------------------------------------|
| 20L<br>Energy: -25.77286678<br>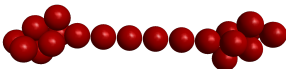 | 20M<br>Energy: -25.73793923<br> | 20N<br>Energy: -24.83288862<br> |
| 20O<br>Energy: -24.80228231<br> | 20P<br>Energy: -23.86736332<br> | 20Q<br>Energy: -22.77417092<br> |

### SET IIb

|                                                                                                                    |                                                                                                                    |                                                                                                                      |
|--------------------------------------------------------------------------------------------------------------------|--------------------------------------------------------------------------------------------------------------------|----------------------------------------------------------------------------------------------------------------------|
| 20R<br>Energy: -21.67470745<br>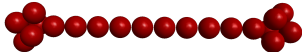 | 20S<br>Energy: -21.45411822<br> | 20T<br>Energy: -20.76142120<br> |
|--------------------------------------------------------------------------------------------------------------------|--------------------------------------------------------------------------------------------------------------------|----------------------------------------------------------------------------------------------------------------------|

|                                                                                                                  |                                                                                                                  |  |
|------------------------------------------------------------------------------------------------------------------|------------------------------------------------------------------------------------------------------------------|--|
| 20U<br>Energy: -20.35164942<br>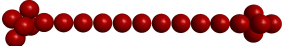 | 20V<br>Energy: -19.02713603<br> |  |
|------------------------------------------------------------------------------------------------------------------|------------------------------------------------------------------------------------------------------------------|--|

SET III

|                                                                                                                   |                                                                                                                  |                                                                                                                    |
|-------------------------------------------------------------------------------------------------------------------|------------------------------------------------------------------------------------------------------------------|--------------------------------------------------------------------------------------------------------------------|
| 20W<br>Energy: -11.57245490<br>  | 20X<br>Energy: -10.72399393<br> | 20Y<br>Energy: -10.33364733<br> |
| 20Z<br>Energy: -9.80365022<br> |                                                                                                                  |                                                                                                                    |
